# Supplementary material for: Transcription profiling during the cell cycle shows that a subset of Polycomb-targeted genes is upregulated during DNA replication
Source: PubMed Central journal article supplement — Nucleic Acids Res. 2013 Jan 15;41(5):2846–56. doi: 10.1093/nar/gks1336 (PMC3597645; doi:10.1093/nar/gks1336), 2013-01-15
Supplement: supp_gks1336_nar-02954-x-2012-File007.pdf [file supp_gks1336_nar-02954-x-2012-File007.pdf]

## Supporting Online Material

### Supplementary Methods 1 – ChIP-seq

Plates (75cm<sup>2</sup>) with ~6 million HaCaT cells were washed twice with PBS, then cross-linked with 0.5% formaldehyde at room temperature for 10 mins, following which cross-linking was quenched by the addition of glycine to 125 mM. Cells were again washed with PBS, then scraped from plates in PBS supplemented with 1mM EDTA and protease inhibitors. Cross-linked cells were collected by centrifugation at 1500 G, and resuspended in cold RIPA buffer (10 mM Tris pH 8.0, 1 mM EDTA, 140 mM NaCl, 1 % Triton X-100, 0.1% SDS, 0.1 % Na-Deoxycholate) supplemented with protease inhibitors at a density of  $1 \times 10^7$  cells/ml. Lysed cells were then sonicated in TPX tubes (Diagenode) using a Bioruptor (Diagenode) for 12 mins on full power, then debris was removed by centrifugation in a chilled microfuge at 16000 G for 15 mins. Soluble chromatin supernatant equivalent to  $3.8 \times 10^6$  cells / IP was pre-cleared using 25  $\mu$ l of a 1:1 mix of protein A and protein G Dynabeads (Invitrogen), then used for overnight immunoprecipitation using either 4  $\mu$ g anti-H3K4me3 antisera (Diagenode s.a., Cat. # pAb-003-050; Lot # A2-002P) or 2  $\mu$ g anti H3K27me3 (Upstate Biotechnology, Cat. # 07-449; Lot # DAM1387952). Antibody-protein complexes were immunoprecipitated with protein A/G Dynabeads, then washed 5 times with RIPA buffer supplemented with protease inhibitors, once with LiCl wash buffer (250 mM LiCl, 10 mM Tris pH 8.0, 1 mM EDTA, 0.5 % Igepal CA-630, 0.5 % Na-deoxycholate) supplemented with protease inhibitors, and once in TE. Immunoprecipitated DNA was isolated by successive RNaseA and proteinase K treatment, followed by purification over Genomic DNA cleanup & concentrator columns (Zymo Research Corp.). Two ng of immunoprecipitated material, or input chromatin isolated as above, was used for library preparation using TruSeq™ DNA Sample Preparation reagents (Illumina), and submitted to the Norwegian Sequencing Centre for sequencing on a HiSeq 2000 (Illumina). IP and control input libraries were clustered on a single lane of an Illumina flowcell using TruSeq™ SR Cluster Kit v3 reagents and subjected to 50 bases of sequencing using TruSeq™ SBS v3 reagents (Illumina). Image analysis and base calling was performed using Illumina's RTA software version 1.12.4.2. Demultiplexing and conversion from bcl file to fastq file was performed using CASAVA v1.8.2. Reads were filtered to remove those with low base call quality using Illumina's default chastity criteria.

### Supplementary Discussion 1 – A PLS model based only on the first 24 hours after release identifies additional cell cycle regulated genes at the expense of additional false positives

When studying the list of genes with previously published phases and the genes on that list not detected by our PLS model to be cell cycle expressed in HaCaT, we noticed that 7 of the 12 missing genes were previously published to be expressed in S phase (Supplementary Table 1). Closer inspection of the expression profiles indicated that some

of these genes appeared to have a cyclic expression pattern during the first cell division. We therefore created a new PLS model based on only the first 24 hours after release (Supplementary Fig. 3). This model identified several additional cell cycle genes, including 4 of the 12 genes missed by the PLS model based on all the 33 hours after release (Supplementary Fig. 4, Supplementary Table 1). Although the 24 hours PLS model gave an increased coverage of known cell cycle genes of about 8%, this was at the expense of about 9% additional significant cell cycle genes than the 33 hours model. Using all the available probes on the chip instead of only the probe that showed the highest variation for each Entrez gene further increased the coverage of known cell cycle genes to 42 of 48 genes, but also increased the total number of significant cell cycle genes to 2081 (data not shown). To limit the influence of potential false positives and focus our analyses on genes that showed consistent cyclic expression across multiple cell divisions, we therefore decided to use the 33 hours PLS model as basis for further analyses.

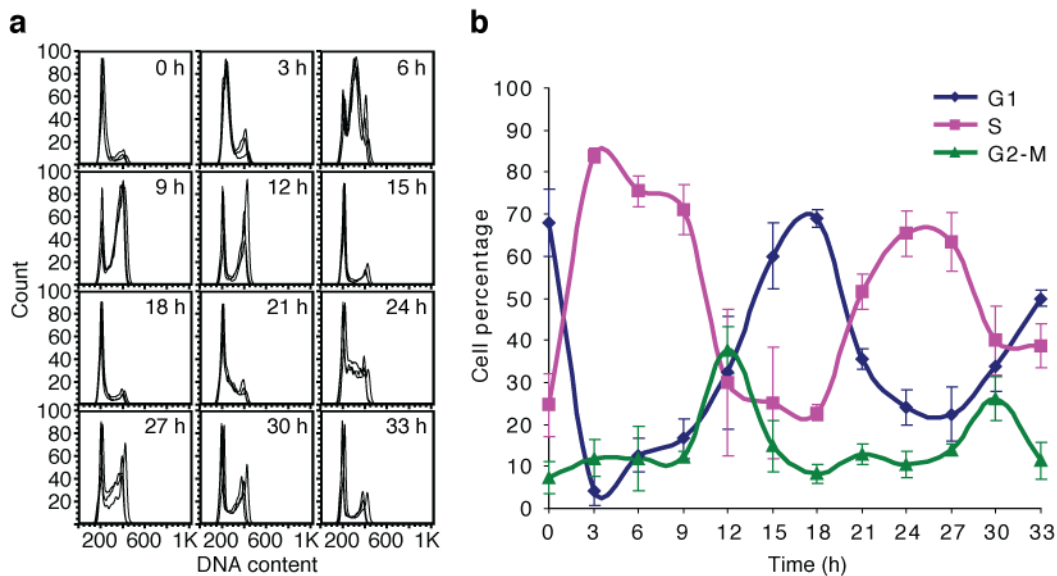

**Supplementary Figure 1 - Synchrony of double thymidine blocked HaCaT cells. (a)** Cell synchrony was monitored by flow cytometry of propidium iodide-stained cells. The figures show for each time point, superimposed profiles of three replicate synchronization experiments. Horizontal axes show DNA content (arbitrary units) and vertical axes show the number of events (cells) with the corresponding DNA content. **(b)** Percentage of cells assigned to G1, S, and G2/M phases for each of the time points analyzed. Values and error bars are averages and standard deviations ( $n = 3$ ).

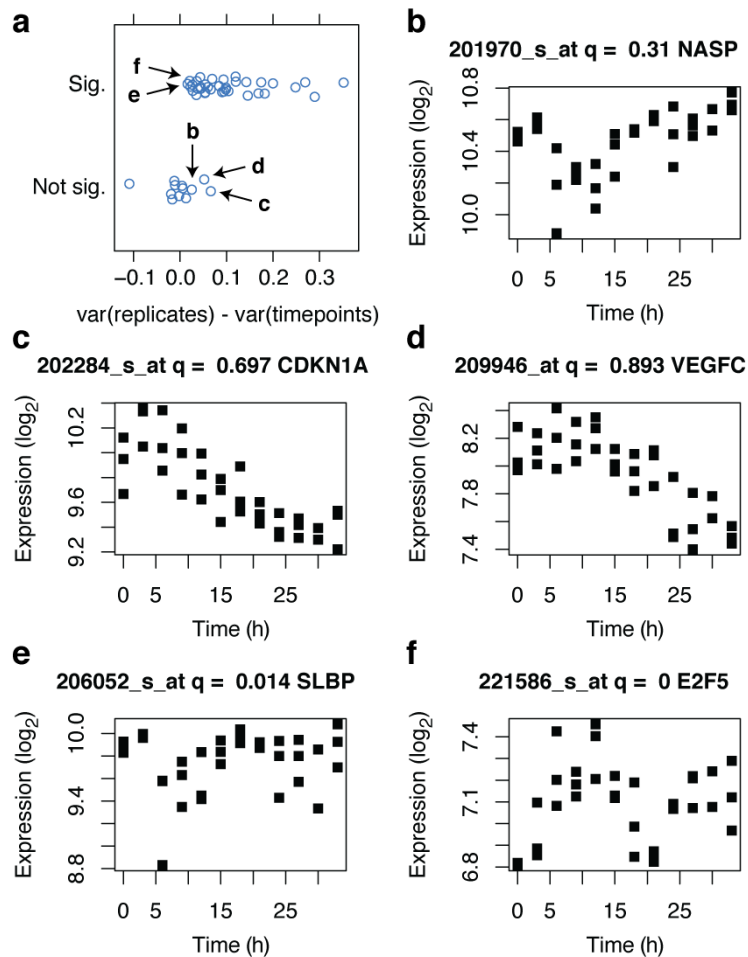

**Supplementary Figure 2 - “Missing” cell cycle genes either show no cyclic expression or have more variance between replicates than “detected” cell cycle genes. (a)** The figure shows the average expression variance across the 12 time points (var(replicates); variance averaged over the 3 replicates) minus the average expression variance across the 3 replicates (var(timepoints); variance averaged over the 12 time points) for the previously known cell cycle regulated genes (table S2) detected (“Sig.”) and not detected (“Not sig.”) to be significantly cell cycle regulated in HaCaT by this study. All the significant genes have higher average variance within a replicate than within time points. In contrast, 6 of the 12 “missing” genes (*BRCA1*, *BRCA2*, *DHFR*, *MSH2*, *RRM1*, and *RAD21*) have lower average variance within a replicate than within time points; that is, their expression was inconsistent and varied as much between the replicates as within the same replicate. Only three of the “missing” genes (*CDKN1A*, *NASP*, and *VEGFC*) had a difference in average variance that was greater than any of the significant genes. Arrows and labels show these three “missing” genes with the largest difference in average variance (**b-d**) and the two significant genes with the smallest difference in average variance (**e-f**). (**b-f**) Expression patterns for the five genes annotated in (a). The “missing” genes (**b-d**) do not show cyclic expression patterns

through both cell cycles, whereas the significant genes do (e-f). (b) *NASP* showed an expression pattern consistent with being up-regulated during S phase and down-regulated during G2/M phase in the first cell cycle but not in the second; that is, *NASP* was down-regulated in the first G2/M phase (9 and 12 hours after release), but not in the second G2/M phase (27 and 30 hours after release). (c-d) *CDKN1A* and *VEGFC* were highly expressed in the first G1/S transition and S phase, but were not up-regulated in the second cell cycle. Figure titles show the probe id, the false discovery rate (q), and the gene name.

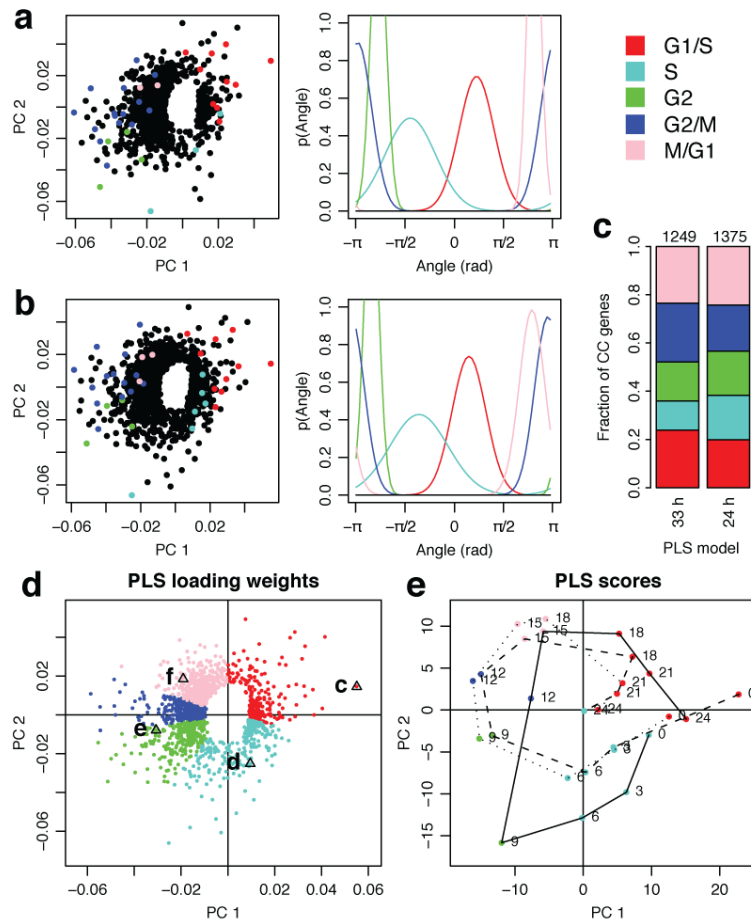

**Supplementary Figure 3 – A cyclic PLS model based on the first 24 hours after release identifies additional genes expressed in S phase in HaCaT. (a-b)** Known cell cycle genes cluster according to their published cell cycle phase. (Left) Loadings plot showing significant genes ( $q < 0.05$ ; permutation test) and the genes with known cell cycle expression (Supplementary Table 2) in the cyclic PLS models based on all the 33 hours (a) and only the first 24 hours (b) after release from double thymidine block. The genes with known cell cycle expression are color-coded according to their known cell cycle phase (red, G1/S; turquoise, S; green, G2; blue, G2/M; and pink, M/G1). (Right) Phase angle probability distributions for the five cell cycle phases estimated based on the phase angles of the known cell cycle genes in the loadings plot (see Methods). Horizontal axis shows the phase angle (radians); vertical axis shows the probability. Note that because the horizontal axis represents a linearization of a circle, the distributions “wrap around” from  $\pi$  to  $-\pi$ . (c) The 24 hours PLS model identifies more genes as significant cell cycle genes than the 33 hours PLS model and the largest increase is for genes expressed in S phase. The bar graphs show the relative distribution of significant genes ( $q < 0.05$ ) in the five cell cycle phases for the 33 hours and 24 hours PLS models. The numbers above the bars show the total number of significant genes in each model. Note that the 24 hours model gave poorer separation of the G2/M and M/G1 phases than the 33

hours model (compare phase angle probability distributions in (a) and (b)), which resulted in the 24 hours model having fewer genes in G2/M phase than the 33 hours model had. (d-e) Loadings (d) and scores (e) plots for the cyclic PLS model based on only the first 24 hours after release from double thymidine block. The solid, dashed, and dotted lines in (e) show the trajectories for the three biological replicates. Labeled triangles in (d) show the location of the four selected genes in Fig. 1: (c) *CCNE2*; (d) *CDKN2C*; (e) *CCNA2*; and (f) *CDKN3*. See Figure 1 for the four genes' expression profiles and additional details regarding loadings and scores plots.

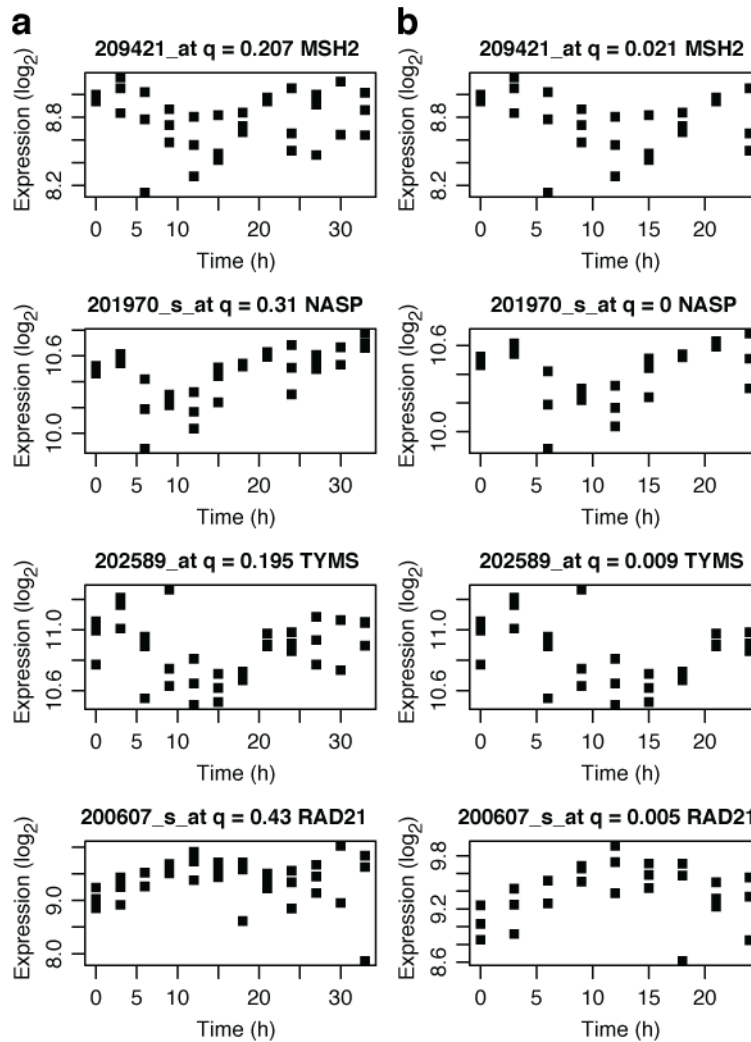

**Supplementary Figure 4 – Expression patterns of the four known cell cycle regulated genes identified by the 24 hours PLS model (b) but missed by the 33 hours PLS model (a).** Figure titles show the probe id, the false discovery rate (q), and the gene name. Except for *RAD21*, the additional genes detected by the 24 hours model were predominantly expressed in G1/S or S phase.



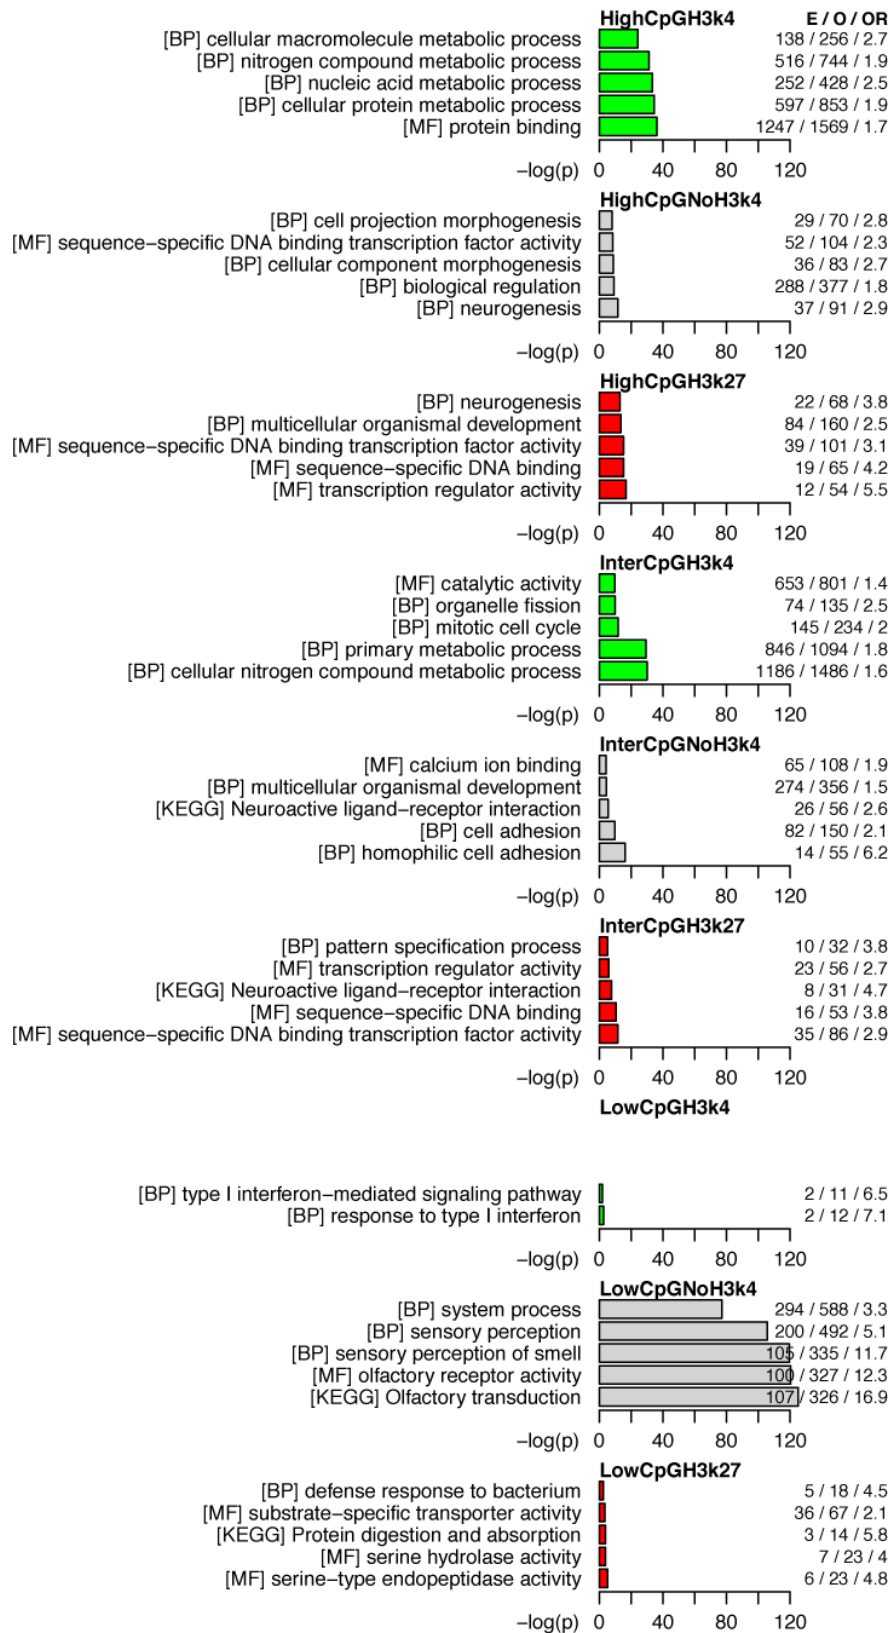

**Supplementary Figure 5 – High-CpG and consistent H3K4me3 are associated with housekeeping functions whereas low-CpG and no or inconsistent H3K4me3 are associated with cell type-specific functions.** The barplots show the five most significantly KEGG pathways (KEGG), or GO molecular function (MF) or biological process (BP) terms overrepresented among all genes with high, intermediate, or low CpG promoters and consistent H3K4me3, H3K27me3, or lack of consistent H3K4me3 modifications. Horizontal axes show Benjamini-Hochberg corrected p-values ( $-\log_{10}$ ); numbers on the right show the expected (E) and observed (O) number of genes and the corresponding odds ratios (OR). Cell type-specific functions such as “Olfactory transduction” are strongly overrepresented among LCG/NoH3K4me3 genes whereas housekeeping functions such as “cellular metabolic process” are overrepresented among HCG/H3K4me3 genes.

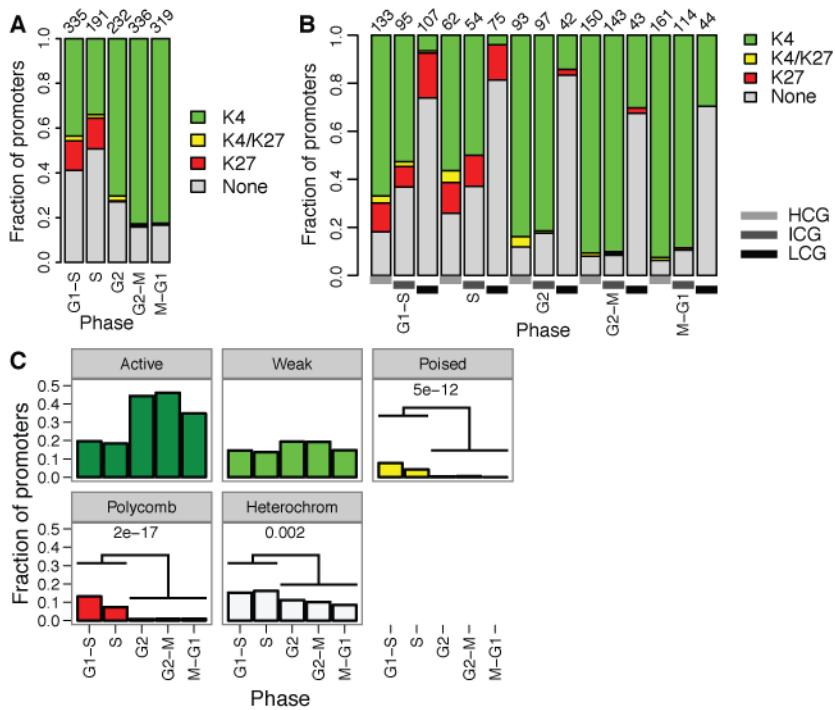

**Supplementary Figure 6 - G1/S and S phase genes are consistently enriched for H3K27me3 marks within multiple cell lines.** (A) Distribution of consistent H3K4me3 and H3K27me3 marks in promoters of genes upregulated in G1/S, S, G2, G2/M, and M/G1 phases; see Fig. 4. (B) Fractions of low-CpG (LCG), intermediate-CpG (ICG), and high-CpG (HCG) promoters for genes upregulated in the five cell cycle phases. (C) Promoter chromatin states for cell cycle genes within the NHEK keratinocyte cell line show that poised and Polycomb-regulated promoters are strongly enriched whereas promoters with heterochromatin regions are weakly enriched among genes expressed during DNA replication. The bar graphs show the fraction of promoters that contain regions classified by a published “Chromatin-state” Hidden Markov Model (1) to be Active, Weak, and Poised promoters and Polycomb-repressed and Heterochromatin regions. Lines and numbers within the graphs indicate chromatin states (Poised, Polycomb, and Heterochrom) that are enriched among genes expressed during DNA replication (G1/S and S phases; numbers are p-values from one-tailed binomial tests).

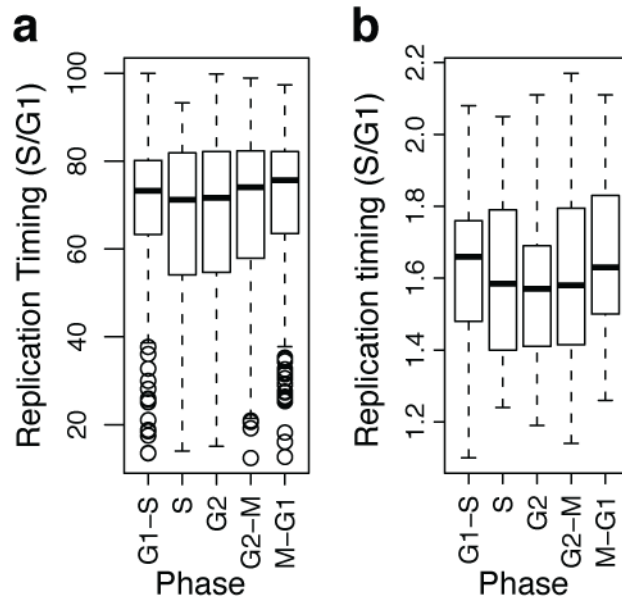

**Supplementary Figure 7 – Data from different cell lines show that HaCaT G1/S genes tend to be replicated earlier than S genes.** The box plots show the replication timing of cell cycle genes from HaCaT in **(a)** basophilic erythroblasts (2) and **(b)** lymphoblastoid cells (3). The replication timing is the median S/G1 ratio of regions overlapping each gene; data from sequencing-based TimEX **(a)** are normalized S/G1 ratios (see (2)); data from microarray-based hybridization experiments **(b)** are probe S/G1 ratios (see (3)). For **(a)** early and late replicating regions have values close 100 and 0, respectively, whereas for **(b)** early and late replicating regions have values close to 2 and 1, respectively. Boxes, horizontal black line, and circles show the first and third quartiles, the median, and outliers; whiskers show the most extreme datapoints up to 1.5 times the interquartile range from the box.

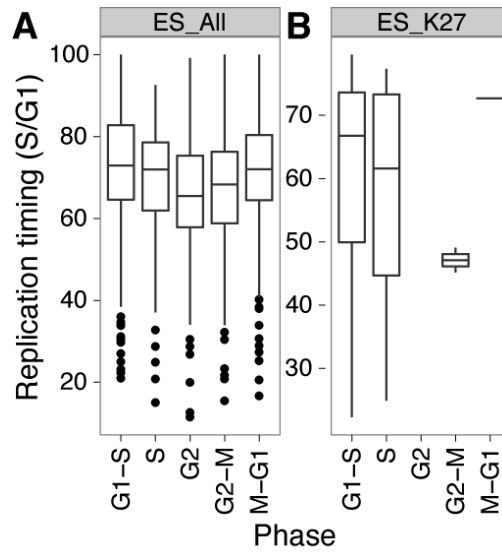

**Supplementary Figure 8 – Replication timing for genes residing in regions with stable replication timing.** (A) Replication timing within all cell cycle genes that do not overlap regions found by Hansen and colleagues to exhibit replication timing plasticity (4). The data is a subset of Figure 4E where all transcripts that overlap regions with replication timing plasticity have been removed (regions of replication timing plasticity were defined in Supplementary Table S2 in (4)) (B) Replication timing within the subset of genes from (A) that are marked with H3K27me3 within their promoters. (A-B) Replication timing is the median S/G1 ratio within embryonic stem cells (2) of regions overlapping each gene. See Supplementary Figure 7 for details on the box-and-whisker plots.

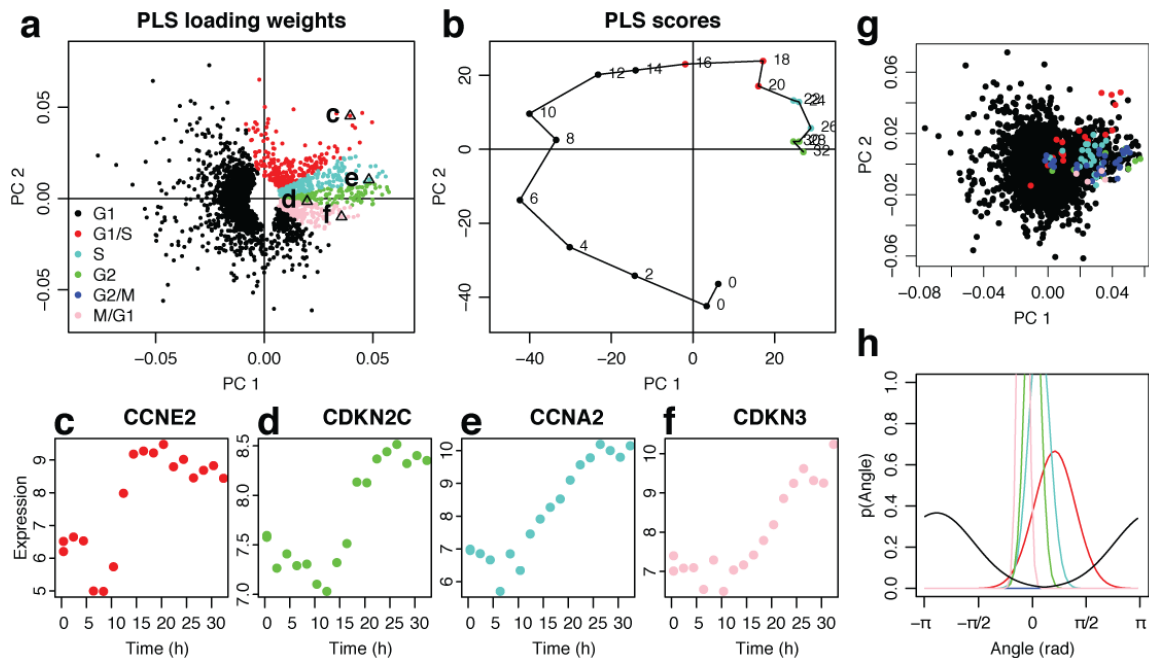

**Supplementary Figure 9 – Partial least squares (PLS) regression reanalysis of serum starved primary foreskin fibroblasts identifies cell cycle genes.** (a-b) Loadings (a) and scores (b) plots for a cyclic PLS model of the gene expression profiles from Bar-Joseph and colleagues' primary foreskin fibroblast experiment (5). The period used was 30 hours estimated based on the cells' DNA content profile (Fig. 1a in (5)). Labeled triangles in (a) show the location of the four selected genes from Figure 1 and panels (c-f) show their expression profiles. The genes are (c) *CCNE2*; (d) *CDKN2C*; (e) *CCNA2*; and (f) *CDKN3*. See Figure 1 for additional details regarding loadings and scores plots. (g) Loadings plot showing the genes with known cell cycle expression (Supplementary Table 2) in the PLS model (a). (h) Phase angle probability distributions for four of the five cell cycle phases. Specifically, we excluded the G2/M phase from the model, as the experiment, in contrast to the HaCaT double thymidine block experiment (Fig. 1; Supplementary Figure 3a), did not give sufficient temporal resolution to accurately separate the genes in the G2/M phase from the G2 and M/G1 phases; compare the patterns for the genes with known cell cycle expression in Supplementary Figure 3a with their pattern in (g). In Supplementary Figure 3a, these known genes are well separated, whereas in the primary foreskin fibroblast data, the genes are clustered at the end of the series and the G2/M phase genes completely overlap the G2 and M/G1 genes. Also shown in (h) is the phase angle probability distribution for the G1 phase, as estimated by the cells' DNA content profile. These phase angles had a marked lack of known cell cycle genes (see g), and were therefore excluded from the model. The final cell cycle model, which included the G1/S, S, G2, and M/G1 phases, consisted of 627 distinct genes and included 60% of the genes originally reported by Bar-Joseph and colleagues. See Methods and Supplementary Figure 3 for additional details.

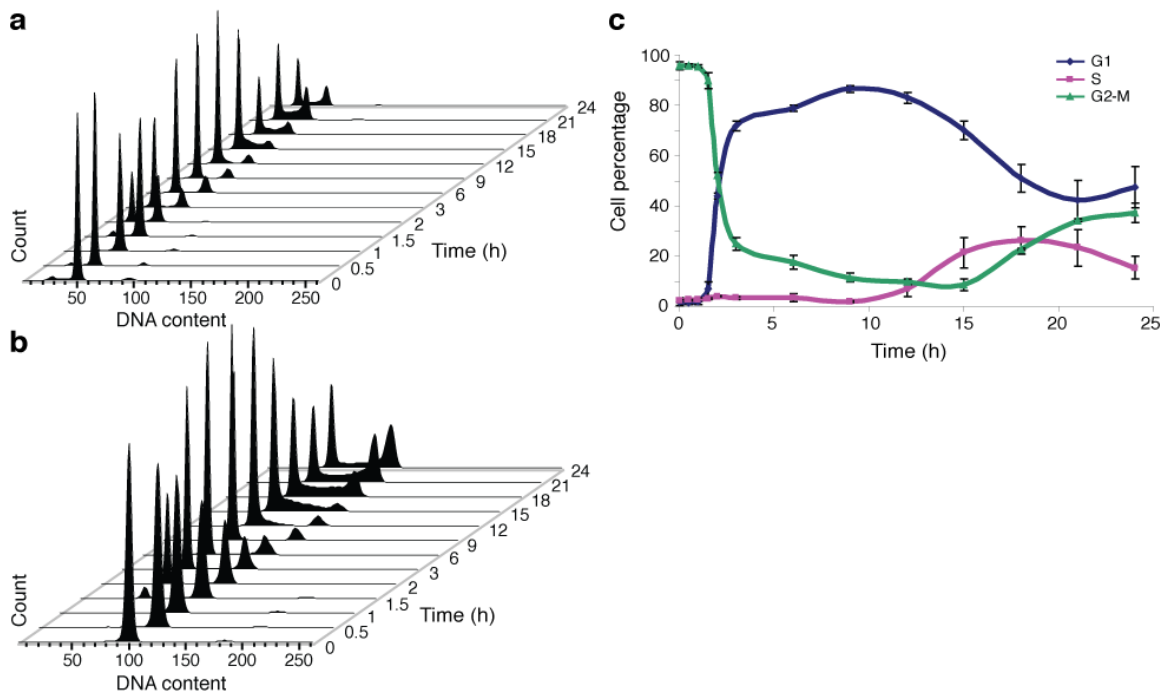

**Supplementary Figure 10 – Synchrony by nocodazole and mitotic shake-off blocked HeLa cells. (a and b)** Cell synchrony was monitored by flow cytometry of propidium iodide-stained cells. The figures show for each of the two biological replicates, DNA profiles at each time point of the synchronization experiment. Horizontal axes show DNA content (arbitrary units) and vertical axes show the number of events (cells) with the corresponding DNA content. **(c)** Percentage of cells assigned to G1, S, and G2/M phases for each of the time points analyzed. Values and error bars are averages and standard deviations (n = 2).

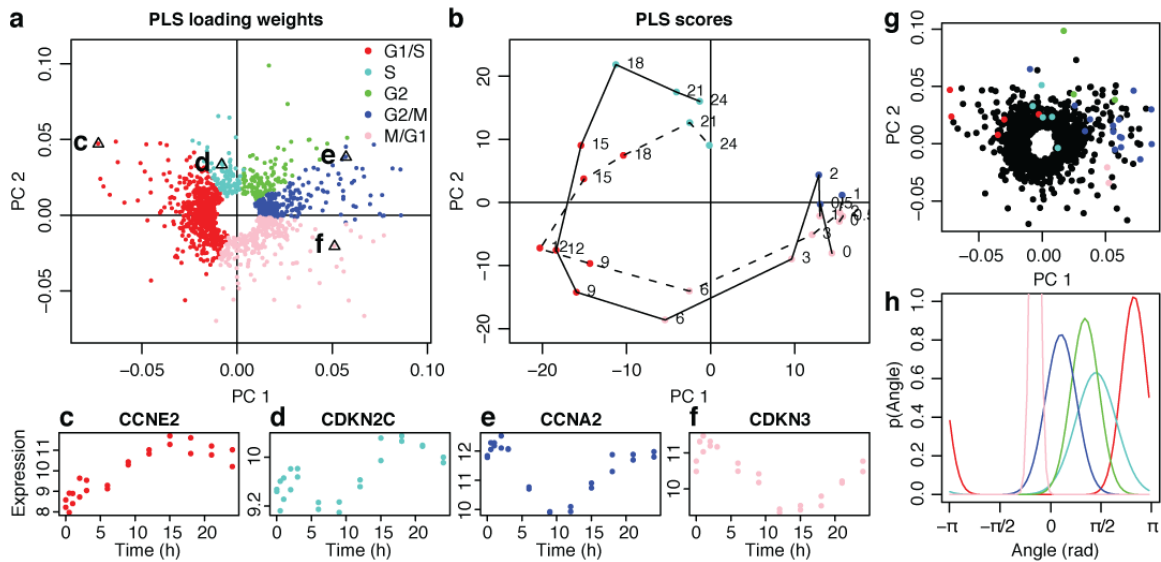

**Supplementary Figure 11 – Nocodazole, mitotic shake-off, and partial least squares (PLS) regression identifies HeLa cell cycle genes.** (a-b) Loadings (a) and scores (b) plots for a cyclic PLS model of the gene expression profiles from HeLa cells synchronized by nocodazole treatment and mitotic shake-off. The period used was 25 hours estimated based on the cells' DNA content profile (Supplementary Fig. 10). Labeled triangles in (a) show the location of the four selected genes from Figure 1 and panels (c-f) show their expression profiles. The genes are (c) *CCNE2*; (d) *CDKN2C*; (e) *CCNA2*; and (f) *CDKN3*. See Figure 1 for additional details regarding loadings and scores plots. (g) Loadings plot showing significant genes ( $q < 0.05$ ; permutation test) and the genes with known cell cycle expression (Supplementary Table 2) in the PLS model (a). (h) Phase angle probability distributions for the five cell cycle phases. See Methods and Supplementary Figure 3 for additional details.



**Supplementary Table 1 - List of genes with previously published phases.** The genes are from Table 2 in (6). “Predicted (33 h)” are the cell cycle phases assigned by this study’s main PLS model for the HaCaT cells, which is based on all the time points up to 33 h after release; “Predicted (24 h)” are the cell cycle phases assigned by a PLS model based on only the time points up to 24 h after release (in HaCaT); “Whitfield” are the cell cycle phases reported based on microarray analyses of synchronized HeLa cells (6); “Actual” are previously reported cell cycle phases as compiled by (6).

| Gene          | Predicted (33 h) | Predicted (24 h) | Whitfield | Actual |
|---------------|------------------|------------------|-----------|--------|
| <i>E2F5</i>   | G2               | G2               | G2/M      | G1     |
| <i>CCNE1</i>  | G1/S             | G1/S             | G1/S      | G1/S   |
| <i>CCNE2</i>  | G1/S             | G1/S             | G1/S      | G1/S   |
| <i>CDC25A</i> | G1/S             | G1/S             | G1/S      | G1/S   |
| <i>CDC45L</i> | S                | S                | S         | G1/S   |
| <i>CDC6</i>   | G1/S             | G1/S             | G1/S      | G1/S   |
| <i>CDKN1A</i> | ND               | ND               | ND        | G1/S   |
| <i>E2F1</i>   | G1/S             | G1/S             | G1/S      | G1/S   |
| <i>MCM2</i>   | G1/S             | G1/S             | G1/S      | G1/S   |
| <i>MCM6</i>   | G1/S             | G1/S             | G1/S      | G1/S   |
| <i>NPAT</i>   | ND               | ND               | G1/S      | G1/S   |
| <i>PCNA</i>   | G1/S             | G1/S             | G1/S      | G1/S   |
| <i>SLBP</i>   | G1/S             | G1/S             | G1/S      | G1/S   |
| <i>BRCA1</i>  | ND               | ND               | S         | S      |
| <i>BRCA2</i>  | ND               | ND               | ND        | S      |
| <i>CCNG2</i>  | S                | S                | ND        | S      |
| <i>CDKN2C</i> | S                | S                | G2        | S      |
| <i>DHFR</i>   | ND               | ND               | S         | S      |
| <i>MSH2</i>   | ND               | G1/S             | G1/S      | S      |
| <i>NASP</i>   | ND               | G1/S             | G1/S      | S      |
| <i>RRM1</i>   | ND               | ND               | S         | S      |
| <i>RRM2</i>   | G1/S             | S                | S         | S      |
| <i>TYMS</i>   | ND               | S                | S         | S      |
| <i>CCNA2</i>  | G2               | G2               | G2        | G2     |
| <i>CCNF</i>   | G2               | G2               | G2        | G2     |
| <i>CENPF</i>  | G2               | G2               | G2/M      | G2     |
| <i>TOP2A</i>  | G2               | G2               | G2        | G2     |
| <i>BIRC5</i>  | M/G1             | ND               | G2/M      | G2/M   |
| <i>BUB1</i>   | G2/M             | G2/M             | G2/M      | G2/M   |
| <i>BUB1B</i>  | G2/M             | G2/M             | G2/M      | G2/M   |
| <i>CCNB1</i>  | G2/M             | G2/M             | G2/M      | G2/M   |
| <i>CCNB2</i>  | M/G1             | M/G1             | G2/M      | G2/M   |
| <i>CDK1</i>   | G2               | G2               | G2        | G2/M   |
| <i>CDC20</i>  | M/G1             | M/G1             | G2/M      | G2/M   |
| <i>CDC25B</i> | G2/M             | G2/M             | G2/M      | G2/M   |

|                |      |      |      |      |
|----------------|------|------|------|------|
| <i>CDC25C</i>  | G2/M | G2   | G2   | G2/M |
| <i>CDKN2D</i>  | ND   | ND   | G2/M | G2/M |
| <i>CENPA</i>   | G2   | G2   | G2/M | G2/M |
| <i>CKS1B</i>   | G2/M | G2/M | G2   | G2/M |
| <i>CKS2</i>    | G2/M | G2/M | G2/M | G2/M |
| <i>PLK1</i>    | G2/M | G2/M | G2/M | G2/M |
| <i>AURKA</i>   | G2   | G2   | G2/M | G2/M |
| <i>RACGAP1</i> | G2/M | G2/M | NM   | G2/M |
| <i>KIF20A</i>  | G2/M | M/G1 | NM   | G2/M |
| <i>RAD21</i>   | ND   | G2/M | M/G1 | M/G1 |
| <i>PTTG1</i>   | M/G1 | M/G1 | M/G1 | M/G1 |
| <i>VEGFC</i>   | ND   | ND   | ND   | M/G1 |
| <i>CDKN3</i>   | M/G1 | M/G1 | M/G1 | M/G1 |

ND: Not determined; the gene was not detected as having a significant cell cycle expression pattern. NM: Not measured; the gene was not present on the microarray used by (6).

**Supplementary Table 2 - Cell cycle genes common for foreskin fibroblasts (FF) (5), HeLa (6), and HaCaT are strongly enriched for cell cycle-related terms.** The table shows all KEGG pathways and GO molecular function (MF), biological process (BP), and cellular component (CC) terms that are overrepresented ( $p < 0.05$ ) among the 125 cell cycle Entrez genes common for FF, HeLa, and HaCaT. The table is sorted based on the Benjamini-Hochberg-corrected p-value ( $p$ ) of a hypergeometric test for overrepresentation, which for the GO terms was conditioned on the structure of the GO graph (7). Exp. and Count are the expected and observed number of genes; OR is the corresponding odds ratio; Size is the size of the background group used in the test. Rows shaded in gray indicate terms that were not significant ( $p < 0.05$ ) among any of the other subsets of cell cycle genes common or exclusive for FF, HeLa, or HaCaT (see fig. S6).

| Ontology | Term                                                   | ID         | p     | OR    | Exp. | Count | Size  |
|----------|--------------------------------------------------------|------------|-------|-------|------|-------|-------|
| BP       | organelle fission                                      | GO:0048285 | 2e-45 | 43.1  | 2.0  | 44    | 250   |
| BP       | cell division                                          | GO:0051301 | 1e-33 | 34.6  | 1.7  | 35    | 230   |
| BP       | M phase                                                | GO:0000279 | 3e-33 | 30.0  | 2.2  | 37    | 309   |
| BP       | cell cycle process                                     | GO:0022402 | 8e-31 | 27.3  | 2.4  | 36    | 359   |
| KEGG     | Cell cycle                                             | 04110      | 3e-30 | 72.9  | 1.1  | 26    | 129   |
| BP       | mitotic cell cycle                                     | GO:0000278 | 1e-29 | 28.0  | 2.1  | 34    | 309   |
| BP       | mitosis                                                | GO:0007067 | 1e-26 | 40.1  | 1.1  | 26    | 157   |
| CC       | non-membrane-bounded organelle                         | GO:0043228 | 2e-19 | 6.6   | 17.3 | 61    | 2351  |
| CC       | nucleoplasm                                            | GO:0005654 | 1e-17 | 9.2   | 5.7  | 36    | 770   |
| CC       | organelle lumen                                        | GO:0043233 | 2e-17 | 6.6   | 12.3 | 50    | 1670  |
| BP       | DNA replication                                        | GO:0006260 | 3e-16 | 22.8  | 1.2  | 20    | 158   |
| CC       | intracellular organelle                                | GO:0043229 | 2e-15 | 8.7   | 62.3 | 104   | 8480  |
| BP       | cellular component organization                        | GO:0016043 | 2e-14 | 6.5   | 13.4 | 48    | 1960  |
| CC       | intracellular                                          | GO:0005622 | 9e-14 | 18.2  | 76.7 | 111   | 10435 |
| CC       | membrane-bounded organelle                             | GO:0043227 | 2e-12 | 5.4   | 55.3 | 95    | 7530  |
| CC       | organelle part                                         | GO:0044422 | 7e-12 | 7.2   | 9.8  | 36    | 2115  |
| BP       | chromosome organization                                | GO:0051276 | 1e-11 | 8.9   | 3.7  | 25    | 460   |
| CC       | condensed chromosome                                   | GO:0000793 | 1e-11 | 25.5  | 0.7  | 13    | 91    |
| KEGG     | DNA replication                                        | 03030      | 3e-10 | 48.9  | 0.3  | 9     | 36    |
| CC       | spindle                                                | GO:0005819 | 2e-9  | 29.6  | 0.4  | 10    | 65    |
| CC       | chromosome                                             | GO:0005694 | 1e-8  | 12.4  | 1.4  | 14    | 221   |
| BP       | phosphoinositide-mediated signaling                    | GO:0048015 | 2e-8  | 22.4  | 0.6  | 11    | 78    |
| CC       | condensed chromosome kinetochore                       | GO:0000777 | 3e-8  | 39.8  | 0.3  | 8     | 38    |
| BP       | DNA packaging                                          | GO:0006323 | 7e-8  | 16.5  | 0.9  | 12    | 112   |
| BP       | spindle organization                                   | GO:0007051 | 1e-7  | 138.5 | 0.1  | 6     | 12    |
| BP       | regulation of cyclin-dependent protein kinase activity | GO:0000079 | 2e-7  | 28.1  | 0.4  | 9     | 52    |
| BP       | chromosome segregation                                 | GO:0007059 | 5e-7  | 24.9  | 0.5  | 9     | 59    |
| CC       | nucleus                                                | GO:0005634 | 9e-7  | 4.9   | 12.8 | 33    | 3157  |
| CC       | microtubule cytoskeleton                               | GO:0015630 | 1e-6  | 12.6  | 1.0  | 11    | 180   |
| MF       | protein binding                                        | GO:0005515 | 3e-6  | 3.6   | 44.1 | 71    | 6555  |

|      |                                                                                    |            |      |       |      |    |      |
|------|------------------------------------------------------------------------------------|------------|------|-------|------|----|------|
| CC   | centrosome                                                                         | GO:0005813 | 6e-6 | 10.4  | 1.2  | 11 | 175  |
| MF   | ATP binding                                                                        | GO:0005524 | 1e-5 | 3.7   | 10.8 | 31 | 1426 |
| BP   | G2 phase of mitotic cell cycle                                                     | GO:0000085 | 1e-5 | 513.4 | 0.0  | 4  | 5    |
| BP   | cell cycle                                                                         | GO:0007049 | 2e-5 | 16.3  | 0.7  | 9  | 175  |
| MF   | microtubule motor activity                                                         | GO:0003777 | 2e-5 | 16.6  | 0.6  | 8  | 76   |
| MF   | adenyl nucleotide binding                                                          | GO:0030554 | 4e-5 | 3.4   | 11.5 | 31 | 1518 |
| CC   | chromosome passenger complex                                                       | GO:0032133 | 6e-5 | Inf   | 0.0  | 3  | 3    |
| MF   | nucleoside binding                                                                 | GO:0001882 | 6e-5 | 3.3   | 11.7 | 31 | 1544 |
| BP   | DNA repair                                                                         | GO:0006281 | 1e-4 | 7.9   | 1.8  | 12 | 230  |
| BP   | cellular response to stimulus                                                      | GO:0051716 | 2e-4 | 4.5   | 5.3  | 20 | 656  |
| CC   | midbody                                                                            | GO:0030496 | 4e-4 | 56.0  | 0.1  | 4  | 14   |
| BP   | regulation of mitosis                                                              | GO:0007088 | 4e-4 | 24.2  | 0.3  | 6  | 40   |
| CC   | microtubule                                                                        | GO:0005874 | 4e-4 | 7.4   | 1.5  | 10 | 216  |
| BP   | cell proliferation                                                                 | GO:0008283 | 6e-4 | 3.8   | 7.3  | 23 | 914  |
| KEGG | p53 signaling pathway                                                              | 04115      | 8e-4 | 12.7  | 0.6  | 6  | 69   |
| CC   | cytosol                                                                            | GO:0005829 | 8e-4 | 3.4   | 7.6  | 22 | 1035 |
| CC   | chromosome, centromeric region                                                     | GO:0000775 | 1e-3 | 22.2  | 0.3  | 5  | 41   |
| BP   | positive regulation of nuclear division                                            | GO:0051785 | 1e-3 | 32.3  | 0.2  | 5  | 25   |
| CC   | DNA replication factor C complex                                                   | GO:0005663 | 1e-3 | 138.7 | 0.0  | 3  | 6    |
| MF   | purine ribonucleotide binding                                                      | GO:0032555 | 1e-3 | 2.9   | 13.4 | 31 | 1772 |
| BP   | mitotic sister chromatid segregation                                               | GO:0000070 | 1e-3 | 66.6  | 0.1  | 4  | 12   |
| KEGG | Mismatch repair                                                                    | 03430      | 1e-3 | 27.0  | 0.2  | 4  | 23   |
| BP   | microtubule-based movement                                                         | GO:0007018 | 1e-3 | 11.0  | 0.8  | 8  | 104  |
| BP   | establishment of chromosome localization                                           | GO:0051303 | 1e-3 | 388.6 | 0.0  | 3  | 4    |
| BP   | nucleosome assembly                                                                | GO:0006334 | 2e-3 | 13.4  | 0.6  | 7  | 77   |
| CC   | outer kinetochore of condensed chromosome                                          | GO:0000940 | 2e-3 | 104.0 | 0.1  | 3  | 7    |
| BP   | DNA replication initiation                                                         | GO:0006270 | 3e-3 | 52.3  | 0.1  | 4  | 14   |
| BP   | regulation of organelle organization                                               | GO:0033043 | 3e-3 | 10.0  | 0.9  | 8  | 117  |
| CC   | spindle microtubule                                                                | GO:0005876 | 3e-3 | 31.1  | 0.2  | 4  | 22   |
| CC   | nuclear chromosome                                                                 | GO:0000228 | 4e-3 | 8.8   | 0.9  | 7  | 120  |
| BP   | chromatin assembly or disassembly                                                  | GO:0006333 | 5e-3 | 9.2   | 1.0  | 8  | 124  |
| MF   | DNA-dependent ATPase activity                                                      | GO:0008094 | 6e-3 | 16.3  | 0.4  | 5  | 47   |
| BP   | mitotic cell cycle spindle assembly checkpoint                                     | GO:0007094 | 1e-2 | 95.3  | 0.1  | 3  | 7    |
| MF   | 5'-flap endonuclease activity                                                      | GO:0017108 | 1e-2 | Inf   | 0.0  | 2  | 2    |
| BP   | cytokinesis                                                                        | GO:0000910 | 2e-2 | 17.5  | 0.3  | 5  | 42   |
| CC   | nucleolus                                                                          | GO:0005730 | 2e-2 | 3.4   | 5.0  | 15 | 675  |
| MF   | hydrolase activity, acting on acid anhydrides, in phosphorus-containing anhydrides | GO:0016818 | 2e-2 | 3.4   | 5.4  | 16 | 712  |
| BP   | negative regulation of mitosis                                                     | GO:0045839 | 2e-2 | 76.3  | 0.1  | 3  | 8    |
| MF   | nucleotide binding                                                                 | GO:0000166 | 2e-2 | 2.4   | 16.3 | 32 | 2156 |
| CC   | cytoplasm                                                                          | GO:0005737 | 2e-2 | 2.0   | 50.4 | 70 | 6857 |
| CC   | spindle pole centrosome                                                            | GO:0031616 | 2e-2 | 275.0 | 0.0  | 2  | 3    |

|      |                                                                   |            |      |      |      |    |      |
|------|-------------------------------------------------------------------|------------|------|------|------|----|------|
| BP   | regulation of ubiquitin-protein ligase activity                   | GO:0051438 | 2e-2 | 11.3 | 0.6  | 6  | 75   |
| BP   | positive regulation of cell cycle                                 | GO:0045787 | 2e-2 | 15.8 | 0.4  | 5  | 46   |
| KEGG | Small cell lung cancer                                            | 05222      | 2e-2 | 8.0  | 0.7  | 5  | 86   |
| BP   | mitotic cell cycle checkpoint                                     | GO:0007093 | 3e-2 | 25.6 | 0.2  | 4  | 25   |
| CC   | kinesin complex                                                   | GO:0005871 | 3e-2 | 32.0 | 0.1  | 3  | 16   |
| BP   | cellular biopolymer metabolic process                             | GO:0034960 | 3e-2 | 2.2  | 43.9 | 65 | 5477 |
| BP   | regulation of catalytic activity                                  | GO:0050790 | 4e-2 | 3.4  | 5.7  | 17 | 716  |
| BP   | regulation of phosphate metabolic process                         | GO:0019220 | 4e-2 | 4.4  | 3.1  | 12 | 383  |
| BP   | cellular macromolecular complex subunit organization              | GO:0034621 | 4e-2 | 4.3  | 3.1  | 12 | 385  |
| BP   | establishment or maintenance of microtubule cytoskeleton polarity | GO:0030951 | 5e-2 | Inf  | 0.0  | 2  | 2    |
| BP   | DNA replication-dependent nucleosome assembly                     | GO:0006335 | 5e-2 | Inf  | 0.0  | 2  | 2    |
| BP   | positive regulation of mitotic metaphase/anaphase transition      | GO:0045842 | 5e-2 | Inf  | 0.0  | 2  | 2    |
| BP   | mitotic chromosome movement towards spindle pole                  | GO:0007079 | 5e-2 | Inf  | 0.0  | 2  | 2    |
| BP   | mitotic spindle elongation                                        | GO:0000022 | 5e-2 | Inf  | 0.0  | 2  | 2    |
| BP   | DNA replication, removal of RNA primer                            | GO:0043137 | 5e-2 | Inf  | 0.0  | 2  | 2    |
| BP   | regulation of kinase activity                                     | GO:0043549 | 5e-2 | 5.1  | 2.2  | 10 | 272  |

## References

1. Ernst, J., Kheradpour, P., Mikkelsen, T.S., Shores, N., Ward, L.D., Epstein, C.B., Zhang, X., Wang, L., Issner, R., Coyne, M. *et al.* (2011) Mapping and analysis of chromatin state dynamics in nine human cell types. *Nature*, **473**, 43-49.
2. Desprat, R., Thierry-Mieg, D., Lailier, N., Lajugie, J., Schildkraut, C., Thierry-Mieg, J. and Bouhassira, E.E. (2009) Predictable dynamic program of timing of DNA replication in human cells. *Genome Res*, **19**, 2288-2299.
3. Woodfine, K., Fiegler, H., Beare, D.M., Collins, J.E., McCann, O.T., Young, B.D., Debernardi, S., Mott, R., Dunham, I. and Carter, N.P. (2004) Replication timing of the human genome. *Hum Mol Genet*, **13**, 191-202.
4. Hansen, R.S., Thomas, S., Sandstrom, R., Canfield, T.K., Thurman, R.E., Weaver, M., Dorschner, M.O., Gartler, S.M. and Stamatoyannopoulos, J.A. (2010) Sequencing newly replicated DNA reveals widespread plasticity in human replication timing. *Proc Natl Acad Sci U S A*, **107**, 139-144.
5. Bar-Joseph, Z., Siegfried, Z., Brandeis, M., Brors, B., Lu, Y., Eils, R., Dynlacht, B.D. and Simon, I. (2008) Genome-wide transcriptional analysis of the human cell cycle identifies genes differentially regulated in normal and cancer cells. *Proc Natl Acad Sci U S A*, **105**, 955-960.
6. Whitfield, M.L., Sherlock, G., Saldanha, A.J., Murray, J.I., Ball, C.A., Alexander, K.E., Matese, J.C., Perou, C.M., Hurt, M.M., Brown, P.O. *et al.* (2002) Identification of genes periodically expressed in the human cell cycle and their expression in tumors. *Mol Biol Cell*, **13**, 1977-2000.
7. Falcon, S. and Gentleman, R. (2007) Using GOSTats to test gene lists for GO term association. *Bioinformatics*, **23**, 257-258.
